# Supplementary material for: Pepper Plants Harboring L Resistance Alleles Showed Tolerance toward Manifestations of Tomato Brown Rugose Fruit Virus Disease
Source: MDPI journal article supplement (doi:10.3390/plants11182378), 2022-09-12
Supplement: s1 [file s1]

## Supplementary file

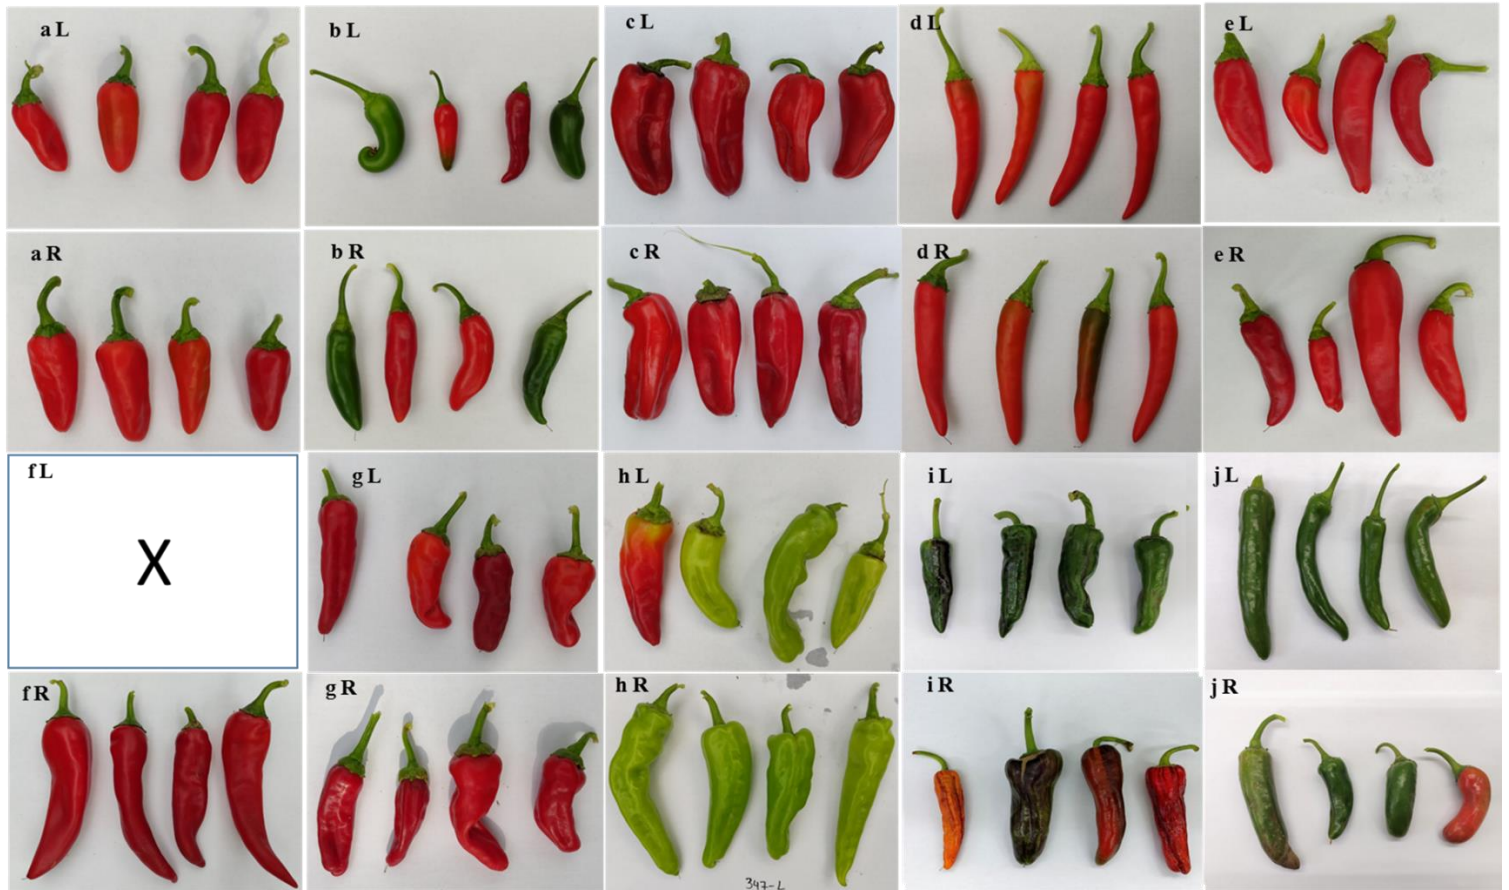

**Figure S1.** Dissociation between transient ToBRFV leaf infection and disease symptoms on fruits. Fruits were collected at 142 dpi from L0 cv. 6210 plants (b), 8 UD plants (a, c-i) and L1 cv. Lapid (j) were Asymptomatic. Leaf-inoculated cv. 354 plants collapsed and did not reach the fruiting stage (f). L, leaf-inoculated; R, root-inoculated.
